# Supplementary material
Source: HighWire-hosted journal article supplement (https://thorax.bmj.com/content/thoraxjnl-2016-208985)
Supplement: inline-supplementary-material-1 [file inline-supplementary-material-1.pdf]

|                                                                           | Term Controls<br>(reference) | Preterm       | Preterm       |                |
|---------------------------------------------------------------------------|------------------------------|---------------|---------------|----------------|
|                                                                           |                              |               | No BPD        | BPD            |
| <b>Forced flows and volumes (Spirometry)</b>                              |                              |               |               |                |
| N successful                                                              | 48                           | 131           | 52            | 79             |
| FEV <sub>1</sub> Z-score                                                  | 0.04 (0.90)                  | -0.72 (1.13)* | -0.21 (0.99)  | -1.06 (1.09)*# |
| FEV <sub>1</sub> /FVC Z-score                                             | -0.27 (0.92)                 | -1.25 (1.01)* | -1.02 (0.93)* | -1.41 (1.04)*  |
| FEF <sub>25-75</sub> Z-score                                              | -0.42 (0.90)                 | -1.46 (1.11)* | -1.06 (1.02)* | -1.75 (1.08)*# |
| FVC Z-score                                                               | 0.17 (0.95)                  | 0.13 (1.04)   | 0.43 (0.86)   | -0.07 (1.11)#  |
| <b>Lung volume and ventilation distribution (Multiple Breath Washout)</b> |                              |               |               |                |
| N successful                                                              | 50                           | 140           | 55            | 85             |
| LCI                                                                       | 6.14 (0.58)                  | 6.33 (0.82)   | 6.38 (0.85)   | 6.30 (0.79)    |
| FRC Z-score                                                               | -0.09 (0.96)                 | 0.42 (1.32)*  | 0.54 (1.33)*  | 0.33 (1.31)    |
| TLC Z-score                                                               | -0.16 (0.85)                 | -0.05 (1.02)  | 0.18 (0.93)   | -0.20 (1.05)   |
| RV Z-score                                                                | -0.45 (1.10)                 | -0.16 (1.23)  | -0.11 (1.13)  | -0.20 (1.34)   |
| FRC/TLC (%)                                                               | 50.36 (6.65)                 | 52.80 (7.49)* | 52.05 (6.58)  | 53.30 (8.04)   |
| RV/TLC (%)                                                                | 21.29 (6.18)                 | 22.79 (7.02)  | 22.42 (6.30)  | 23.03 (7.48)   |
| <b>Gas Exchange (DLCO)</b>                                                |                              |               |               |                |
| N successful                                                              | 38                           | 74            | 39            | 35             |
| DL <sub>CO</sub> Z-score                                                  | 0.10 (0.97)                  | 0.28 (1.27)   | 0.34 (1.34)   | 0.21 (1.19)    |
| V <sub>A</sub> Z-score                                                    | -0.72 (1.16)                 | -0.50 (1.33)  | -0.57 (1.46)  | -0.39 (1.20)   |
| K <sub>CO</sub> Z-score                                                   | -0.56 (0.86)                 | -0.57 (0.98)  | -0.44 (1.05)  | -0.72 (0.89)   |
| <b>Respiratory system mechanics (FOT)</b>                                 |                              |               |               |                |
| N successful                                                              | 31                           | 132           | 61            | 71             |
| Rrs <sub>8</sub> Z-score                                                  | 0.00 (0.94)                  | 0.33 (1.04)   | 0.31 (1.11)   | 0.34 (0.98)    |
| Xrs <sub>8</sub> Z-score                                                  | 0.14 (0.53)                  | -0.43 (0.99)* | -0.25 (0.96)  | -0.58 (1.00)*  |
| AX Z-score                                                                | -0.44 (0.85)                 | 0.29 (1.15)*  | 0.08 (1.19)   | 0.48 (1.09)*   |
| Fres Z-score                                                              | -0.18 (1.26)                 | 0.64 (1.23)*  | 0.38 (1.44)   | 0.87 (1.11)*   |

Supplementary Table 1.

|                         | Univariate Analysis |              |              |              | Multivariate Analysis |              |              |              |                      |
|-------------------------|---------------------|--------------|--------------|--------------|-----------------------|--------------|--------------|--------------|----------------------|
|                         | B                   | p-value      | 95% CI Lower | 95% CI Upper | B                     | p-value      | 95% CI Lower | 95% CI Upper | Model R <sup>2</sup> |
| <b>FEV1 z-score</b>     |                     |              |              |              |                       |              |              |              | 0.169                |
| Gestational Age (w)     | 0.103               | <b>0.007</b> | 0.029        | 0.178        | 0.105                 | <b>0.008</b> | 0.028        | 0.182        |                      |
| Birth weight z-score    | 0.330               | <b>0.002</b> | 0.122        | 0.539        | 0.336                 | <b>0.002</b> | 0.124        | 0.548        |                      |
| IMV residual (d)        | -0.007              | 0.344        | -0.021       | 0.007        |                       |              |              |              |                      |
| O2 residual (d)         | -0.008              | <b>0.037</b> | -0.015       | 0.000        | -0.004                | 0.327        | -0.011       | 0.004        |                      |
| CPAP residual (d)       | -0.019              | 0.093        | -0.041       | 0.003        |                       |              |              |              |                      |
| Surfactant residual     | -0.187              | 0.121        | -0.425       | 0.050        |                       |              |              |              |                      |
| Antenatal Steroids      | -0.076              | 0.784        | -0.621       | -0.469       |                       |              |              |              |                      |
| Sepsis                  | -0.524              | <b>0.009</b> | -0.945       | -0.139       | -0.258                | 0.223        | -0.674       | 0.159        |                      |
| <b>FVC z-score</b>      |                     |              |              |              |                       |              |              |              | 0.124                |
| Gestational Age (w)     | 0.080               | <b>0.031</b> | 0.007        | 0.152        | 0.098                 | <b>0.006</b> | 0.028        | 0.169        |                      |
| Birth weight z-score    | 0.297               | <b>0.004</b> | 0.096        | 0.498        | 0.340                 | <b>0.001</b> | 0.142        | 0.538        |                      |
| IMV residual (d)        | -0.011              | 0.105        | -0.024       | 0.002        |                       |              |              |              |                      |
| O2 residual (d)         | -0.004              | 0.243        | -0.012       | 0.003        |                       |              |              |              |                      |
| CPAP residual (d)       | -0.020              | 0.062        | -0.048       | 0.001        |                       |              |              |              |                      |
| Surfactant residual     | -0.148              | 0.204        | -0.378       | 0.081        |                       |              |              |              |                      |
| Antenatal Steroids      | 0.243               | 0.362        | -0.283       | 0.768        |                       |              |              |              |                      |
| Sepsis                  | -0.231              | 0.251        | -0.628       | 0.166        |                       |              |              |              |                      |
| <b>FEV1/FVC z-score</b> |                     |              |              |              |                       |              |              |              | 0.050                |
| Gestational Age (w)     | 0.027               | 0.451        | -0.044       | 0.098        |                       |              |              |              |                      |
| Birth weight z-score    | 0.049               | 0.632        | -0.152       | 0.249        |                       |              |              |              |                      |
| IMV residual (d)        | 0.005               | 0.485        | -0.008       | 0.018        |                       |              |              |              |                      |
| O2 residual (d)         | -0.006              | 0.119        | -0.013       | 0.001        |                       |              |              |              |                      |
| CPAP residual (d)       | 0.004               | 0.707        | -0.017       | 0.025        |                       |              |              |              |                      |
| Surfactant residual     | -0.041              | 0.719        | -0.264       | 0.182        |                       |              |              |              |                      |
| Antenatal Steroids      | -0.615              | <b>0.015</b> | -1.111       | -0.120       | -0.615                | <b>0.015</b> | -1.111       | -0.120       |                      |
| Sepsis                  | -0.262              | 0.176        | -0.644       | 0.120        |                       |              |              |              |                      |
| <b>FEF25-75 z-score</b> |                     |              |              |              |                       |              |              |              | 0.070                |
| Gestational Age (w)     | 0.063               | 0.106        | -0.014       | 0.140        |                       |              |              |              |                      |
| Birth weight z-score    | 0.193               | 0.080        | -0.023       | 0.410        |                       |              |              |              |                      |
| IMV residual (d)        | -0.001              | 0.926        | -0.015       | 0.014        |                       |              |              |              |                      |
| O2 residual (d)         | -0.009              | <b>0.018</b> | -0.017       | -0.002       | -0.0088               | <b>0.040</b> | -0.016       | -0.000       |                      |
| CPAP residual (d)       | -0.006              | 0.578        | -0.029       | 0.016        |                       |              |              |              |                      |
| Surfactant residual     | -0.101              | 0.413        | -0.344       | 0.142        |                       |              |              |              |                      |
| Antenatal Steroids      | -0.461              | 0.099        | -1.010       | 0.088        |                       |              |              |              |                      |
| Sepsis                  | -0.441              | <b>0.037</b> | -0.854       | -0.028       | -0.365                | 0.084        | -0.778       | 0.049        |                      |

Supplementary Table 2: Neonatal factors influencing forced flows and volumes in preterm children

|                      | Univariate Analysis |              |              |              | Multivariate Analysis |              |              |              |                      |
|----------------------|---------------------|--------------|--------------|--------------|-----------------------|--------------|--------------|--------------|----------------------|
|                      | B                   | p-value      | 95% CI Lower | 95% CI Upper | B                     | p-value      | 95% CI Lower | 95% CI Upper | Model R <sup>2</sup> |
| LCI                  |                     |              |              |              |                       |              |              |              | 0.037                |
| Gestational Age (w)  | 0.036               | 0.179        | -0.017       | 0.089        |                       |              |              |              |                      |
| Birth weight z-score | -0.044              | 0.568        | -0.194       | 0.107        |                       |              |              |              |                      |
| IMV residual (d)     | -0.005              | 0.350        | -0.014       | 0.005        |                       |              |              |              |                      |
| O2 residual (d)      | -0.001              | 0.591        | -0.007       | 0.004        |                       |              |              |              |                      |
| CPAP residual (d)    | 0.000               | 0.966        | -0.015       | 0.016        |                       |              |              |              |                      |
| Surfactant residual  | 0.190               | <b>0.025</b> | 0.024        | 0.355        | 0.190                 | <b>0.025</b> | 0.024        | 0.355        |                      |
| Antenatal Steroids   | 0.020               | 0.918        | -0.362       | 0.402        |                       |              |              |              |                      |
| Sepsis               | 0.128               | 0.384        | -0.161       | 0.417        |                       |              |              |              |                      |
| FRC z-score          |                     |              |              |              |                       |              |              |              |                      |
| Gestational Age (w)  | 0.024               | 0.582        | -0.062       | 0.111        |                       |              |              |              |                      |
| Birth weight z-score | -0.090              | 0.467        | -0.334       | 0.153        |                       |              |              |              |                      |
| IMV residual (d)     | -0.001              | 0.905        | -0.017       | 0.015        |                       |              |              |              |                      |
| O2 residual (d)      | 0.001               | 0.781        | -0.007       | 0.010        |                       |              |              |              |                      |
| CPAP residual (d)    | 0.009               | 0.479        | -0.016       | 0.034        |                       |              |              |              |                      |
| Surfactant residual  | 0.041               | 0.767        | -0.231       | 0.313        |                       |              |              |              |                      |
| Antenatal Steroids   | -0.267              | 0.392        | -0.883       | 0.349        |                       |              |              |              |                      |
| Sepsis               | 0.281               | 0.236        | -0.186       | 0.747        |                       |              |              |              |                      |
| TLC z-score          |                     |              |              |              |                       |              |              |              |                      |
| Gestational Age (w)  | 0.046               | 0.173        | -0.021       | 0.113        |                       |              |              |              |                      |
| Birth weight z-score | 0.102               | 0.280        | -0.084       | 0.289        |                       |              |              |              |                      |
| IMV residual (d)     | -0.004              | 0.492        | -0.017       | 0.008        |                       |              |              |              |                      |
| O2 residual (d)      | -0.002              | 0.466        | -0.009       | 0.004        |                       |              |              |              |                      |
| CPAP residual (d)    | -0.010              | 0.305        | -0.030       | 0.009        |                       |              |              |              |                      |
| Surfactant residual  | 0.050               | 0.639        | -0.161       | 0.262        |                       |              |              |              |                      |
| Antenatal Steroids   | 0.024               | 0.920        | -0.456       | 0.504        |                       |              |              |              |                      |
| Sepsis               | 0.100               | 0.589        | -0.264       | 0.464        |                       |              |              |              |                      |
| RV z-score           |                     |              |              |              |                       |              |              |              |                      |
| Gestational Age (w)  | 0.000               | 0.995        | -0.084       | 0.084        |                       |              |              |              |                      |
| Birth weight z-score | -0.226              | 0.058        | -0.459       | 0.008        |                       |              |              |              |                      |
| IMV residual (d)     | -0.001              | 0.904        | -0.016       | 0.014        |                       |              |              |              |                      |
| O2 residual (d)      | 0.001               | 0.724        | -0.007       | 0.010        |                       |              |              |              |                      |
| CPAP residual (d)    | 0.008               | 0.492        | -0.016       | 0.033        |                       |              |              |              |                      |
| Surfactant residual  | 0.119               | 0.374        | -0.144       | 0.381        |                       |              |              |              |                      |
| Antenatal Steroids   | -0.334              | 0.269        | -0.929       | 0.261        |                       |              |              |              |                      |
| Sepsis               | 0.411               | 0.071        | -0.036       | 0.859        |                       |              |              |              |                      |

|                      |        |              |        |        |        |              |        |        |              |
|----------------------|--------|--------------|--------|--------|--------|--------------|--------|--------|--------------|
| <b>FRC/TLC</b>       |        |              |        |        |        |              |        |        | <b>0.070</b> |
| Gestational Age (w)  | -0.348 | 0.163        | -0.838 | 0.143  |        |              |        |        |              |
| Birth weight z-score | -1.428 | <b>0.042</b> | -2.802 | -0.054 | -1.091 | 0.120        | -2.469 | 0.087  |              |
| IMV residual (d)     | 0.017  | 0.702        | -0.073 | 0.108  |        |              |        |        |              |
| O2 residual (d)      | 0.029  | 0.246        | -0.020 | 0.078  |        |              |        |        |              |
| CPAP residual (d)    | 0.196  | <b>0.006</b> | 0.056  | 0.335  | 0.173  | <b>0.017</b> | 0.032  | 0.315  |              |
| Surfactant residual  | -0.118 | 0.881        | -1.672 | 1.436  |        |              |        |        |              |
| Antenatal Steroids   | -2.199 | 0.217        | -5.702 | 1.304  |        |              |        |        |              |
| Sepsis               | 2.451  | 0.069        | -0.191 | 5.092  |        |              |        |        |              |
| <b>RV/TLC</b>        |        |              |        |        |        |              |        |        | <b>0.071</b> |
| Gestational Age (w)  | -0.245 | 0.300        | -0.712 | 0.221  |        |              |        |        |              |
| Birth weight z-score | -1.923 | <b>0.004</b> | -3.204 | -0.641 | -1.832 | <b>0.005</b> | -3.106 | -0.557 |              |
| IMV residual (d)     | 0.012  | 0.783        | -0.074 | 0.097  |        |              |        |        |              |
| O2 residual (d)      | 0.017  | 0.472        | -0.030 | 0.063  |        |              |        |        |              |
| CPAP residual (d)    | 0.123  | 0.072        | -0.011 | 0.257  |        |              |        |        |              |
| Surfactant residual  | 0.555  | 0.457        | -0.917 | 2.026  |        |              |        |        |              |
| Antenatal Steroids   | -2.573 | 0.127        | -5.886 | 0.740  |        |              |        |        |              |
| Sepsis               | 2.514  | <b>0.049</b> | 0.015  | 5.013  | 2.240  | 0.072        | -0.203 | 4.683  |              |

Supplementary Table 3: Neonatal factors influencing lung volume outcomes in preterm children

|                      | Univariate Analysis |              |              |              | Multivariate Analysis |              |              |              |                      |
|----------------------|---------------------|--------------|--------------|--------------|-----------------------|--------------|--------------|--------------|----------------------|
|                      | B                   | p-value      | 95% CI Lower | 95% CI Upper | B                     | p-value      | 95% CI Lower | 95% CI Upper | Model R <sup>2</sup> |
| <b>DLCO z-score</b>  |                     |              |              |              |                       |              |              |              | 0.071                |
| Gestational Age (w)  | 0.008               | 0.894        | -0.01.08     | 0.123        |                       |              |              |              |                      |
| Birth weight z-score | -0.196              | 0.230        | -0.520       | 0.127        |                       |              |              |              |                      |
| IMV residual (d)     | -0.017              | 0.109        | -0.038       | 0.004        |                       |              |              |              |                      |
| O2 residual (d)      | 0.002               | 0.756        | -0.010       | 0.013        |                       |              |              |              |                      |
| CPAP residual (d)    | 0.038               | <b>0.022</b> | 0.006        | 0.070        | 0.038                 | <b>0.022</b> | 0.006        | 0.070        |                      |
| Surfactant residual  | -0.053              | 0.771        | -0.418       | 0.311        |                       |              |              |              |                      |
| Antenatal Steroids   | 0.332               | 0.416        | -0.477       | 1.140        |                       |              |              |              |                      |
| Sepsis               | 0.274               | 0.383        | -0.349       | 0.896        |                       |              |              |              |                      |
| <b>VA z-score</b>    |                     |              |              |              |                       |              |              |              | 0.056                |
| Gestational Age (w)  | -0.010              | 0.872        | -0.132       | 0.112        |                       |              |              |              |                      |
| Birth weight z-score | -0.345              | <b>0.043</b> | -0.681       | -0.012       | -0.345                | <b>0.043</b> | -0.681       | -0.012       |                      |
| IMV residual (d)     | -0.013              | 0.240        | -0.035       | 0.009        |                       |              |              |              |                      |
| O2 residual (d)      | 0.009               | 0.149        | -0.003       | 0.021        |                       |              |              |              |                      |
| CPAP residual (d)    | 0.032               | 0.071        | -0.003       | 0.066        |                       |              |              |              |                      |
| Surfactant residual  | -0.037              | 0.849        | -0.421       | 0.348        |                       |              |              |              |                      |
| Antenatal Steroids   | 0.367               | 0.393        | -0.485       | 1.220        |                       |              |              |              |                      |
| Sepsis               | 0.312               | 0.346        | -0.344       | 0.966        |                       |              |              |              |                      |
| <b>KCO z-score</b>   |                     |              |              |              |                       |              |              |              |                      |
| Gestational Age (w)  | 0.010               | 0.829        | -0.080       | 0.099        |                       |              |              |              |                      |
| Birth weight z-score | 0.099               | 0.437        | -0.153       | 0.350        |                       |              |              |              |                      |
| IMV residual (d)     | -0.008              | 0.314        | -0.024       | 0.008        |                       |              |              |              |                      |
| O2 residual (d)      | -0.007              | 0.120        | -0.016       | 0.002        |                       |              |              |              |                      |
| CPAP residual (d)    | 0.014               | 0.276        | -0.012       | 0.040        |                       |              |              |              |                      |
| Surfactant residual  | 0.001               | 0.995        | -0.282       | 0.283        |                       |              |              |              |                      |
| Antenatal Steroids   | 0.050               | 0.875        | -0.579       | 0.679        |                       |              |              |              |                      |
| Sepsis               | 0.064               | 0.792        | -0.420       | 0.548        |                       |              |              |              |                      |

Supplementary Table 4: Neonatal factors influencing gas exchange properties of the lung in preterm children

|                      | Univariate Analysis |              |              |              | Multivariate Analysis |              |              |              |                      |
|----------------------|---------------------|--------------|--------------|--------------|-----------------------|--------------|--------------|--------------|----------------------|
|                      | B                   | p-value      | 95% CI Lower | 95% CI Upper | B                     | p-value      | 95% CI Lower | 95% CI Upper | Model R <sup>2</sup> |
| <b>Rrs8 z-score</b>  |                     |              |              |              |                       |              |              |              | 0.034                |
| Gestational Age (w)  | 0.028               | 0.429        | -0.042       | 0.098        |                       |              |              |              |                      |
| Birth weight z-score | -0.025              | 0.803        | -0.223       | 0.173        |                       |              |              |              |                      |
| IMV residual (d)     | 0.005               | 0.458        | -0.008       | 0.018        |                       |              |              |              |                      |
| O2 residual (d)      | 0.003               | 0.416        | -0.004       | 0.010        |                       |              |              |              |                      |
| CPAP residual (d)    | -0.022              | <b>0.033</b> | -0.042       | -0.002       | -0.022                | <b>0.033</b> | -0.042       | -0.002       |                      |
| Surfactant residual  | -0.014              | 0.897        | -0.234       | 0.205        |                       |              |              |              |                      |
| Antenatal Steroids   | -0.063              | 0.801        | -0.559       | 0.432        |                       |              |              |              |                      |
| Sepsis               | -0.105              | 0.584        | -0.483       | 0.273        |                       |              |              |              |                      |
| <b>Xrs8 z-score</b>  |                     |              |              |              |                       |              |              |              |                      |
| Gestational Age (w)  | 0.031               | 0.366        | -0.036       | 0.097        |                       |              |              |              |                      |
| Birth weight z-score | 0.078               | 0.416        | -0.111       | 0.266        |                       |              |              |              |                      |
| IMV residual (d)     | -0.003              | 0.681        | -0.015       | 0.010        |                       |              |              |              |                      |
| O2 residual (d)      | -0.006              | 0.070        | -0.013       | 0.001        |                       |              |              |              |                      |
| CPAP residual (d)    | 0.011               | 0.280        | -0.009       | 0.030        |                       |              |              |              |                      |
| Surfactant residual  | -0.073              | 0.490        | -0.282       | 0.136        |                       |              |              |              |                      |
| Antenatal Steroids   | -0.030              | 0.901        | -0.503       | 0.443        |                       |              |              |              |                      |
| Sepsis               | -0.295              | 0.105        | -0.653       | 0.063        |                       |              |              |              |                      |
| <b>AX z-score</b>    |                     |              |              |              |                       |              |              |              | 0.034                |
| Gestational Age (w)  | -0.036              | 0.363        | -0.115       | 0.042        |                       |              |              |              |                      |
| Birth weight z-score | -0.077              | 0.495        | -0.298       | 0.145        |                       |              |              |              |                      |
| IMV residual (d)     | 0.004               | 0.546        | -0.010       | 0.019        |                       |              |              |              |                      |
| O2 residual (d)      | 0.009               | <b>0.035</b> | 0.001        | 0.018        | 0.009                 | <b>0.035</b> | 0.001        | 0.018        |                      |
| CPAP residual (d)    | -0.009              | 0.421        | -0.033       | 0.014        |                       |              |              |              |                      |
| Surfactant residual  | 0.035               | 0.776        | -0.211       | 0.282        |                       |              |              |              |                      |
| Antenatal Steroids   | 0.085               | 0.763        | -0.472       | 0.642        |                       |              |              |              |                      |
| Sepsis               | 0.341               | 0.112        | -0.080       | 0.763        |                       |              |              |              |                      |
| <b>fres z-score</b>  |                     |              |              |              |                       |              |              |              | 0.031                |
| Gestational Age (w)  | -0.046              | 0.299        | -0.134       | 0.042        |                       |              |              |              |                      |
| Birth weight z-score | -0.141              | 0.264        | -0.389       | 0.107        |                       |              |              |              |                      |
| IMV residual (d)     | 0.006               | 0.492        | -0.010       | 0.022        |                       |              |              |              |                      |
| O2 residual (d)      | 0.010               | <b>0.045</b> | 0.000        | 0.019        | 0.010                 | <b>0.045</b> | 0.000        | 0.019        |                      |
| CPAP residual (d)    | -0.009              | 0.477        | -0.035       | 0.017        |                       |              |              |              |                      |
| Surfactant residual  | -0.049              | 0.728        | -0.325       | 0.228        |                       |              |              |              |                      |
| Antenatal Steroids   | 0.175               | 0.579        | -0.449       | 0.800        |                       |              |              |              |                      |
| Sepsis               | 0.338               | 0.160        | -0.136       | 0.812        |                       |              |              |              |                      |

Supplementary Table 5: Neonatal factors influencing respiratory system mechanics in preterm children

|                                      | Univariate Analysis |                  |              |              | Multivariate Analysis |                  |              |              |                      |
|--------------------------------------|---------------------|------------------|--------------|--------------|-----------------------|------------------|--------------|--------------|----------------------|
|                                      | B                   | p-value          | 95% CI Lower | 95% CI Upper | B                     | p-value          | 95% CI Lower | 95% CI Upper | Model R <sup>2</sup> |
| <b>Linear/Triangular Opacities</b>   |                     |                  |              |              |                       |                  |              |              | 0.225                |
| Gestational Age (w)                  | -0.347              | <b>&lt;0.001</b> | -0.474       | -0.220       | -0.330                | <b>&lt;0.001</b> | -0.463       | -0.196       |                      |
| Birth weight z-score                 | 0.003               | 0.988            | -0.395       | 0.401        |                       |                  |              |              |                      |
| IMV residual (d)                     | 0.030               | <b>0.020</b>     | 0.005        | 0.055        | 0.029                 | <b>0.015</b>     | 0.006        | 0.052        |                      |
| O2 residual (d)                      | 0.011               | 0.107            | -0.003       | 0.025        |                       |                  |              |              |                      |
| CPAP residual (d)                    | -0.023              | 0.255            | -0.064       | 0.017        |                       |                  |              |              |                      |
| Surfactant residual                  | -0.221              | 0.325            | -0.662       | 0.221        |                       |                  |              |              |                      |
| Antenatal Steroids                   | 0.171               | 0.738            | -0.838       | 1.179        |                       |                  |              |              |                      |
| Sepsis                               | 1.008               | <b>0.008</b>     | 0.266        | 1.750        | 0.270                 | 0.466            | -0.460       | 0.999        |                      |
| <b>Hypoattenuation (Inspiration)</b> |                     |                  |              |              |                       |                  |              |              | 0.039                |
| Gestational Age (w)                  | -0.113              | <b>0.023</b>     | -0.211       | -0.016       | -0.113                | <b>0.023</b>     | -0.211       | -0.016       |                      |
| Birth weight z-score                 | 0.094               | 0.507            | -0.186       | 0.375        |                       |                  |              |              |                      |
| IMV residual (d)                     | 0.017               | 0.063            | -0.001       | 0.034        |                       |                  |              |              |                      |
| O2 residual (d)                      | 0.006               | 0.204            | -0.003       | 0.016        |                       |                  |              |              |                      |
| CPAP residual (d)                    | -0.011              | 0.463            | -0.039       | 0.018        |                       |                  |              |              |                      |
| Surfactant residual                  | 0.142               | 0.369            | -0.170       | 0.454        |                       |                  |              |              |                      |
| Antenatal Steroids                   | -0.231              | 0.522            | -0.942       | 0.480        |                       |                  |              |              |                      |
| Sepsis                               | 0.431               | 0.112            | -0.102       | 0.964        |                       |                  |              |              |                      |
| <b>Hypoattenuation (expiration)</b>  |                     |                  |              |              |                       |                  |              |              |                      |
| Gestational Age (w)                  | -0.106              | 0.088            | -0.228       | 0.016        |                       |                  |              |              |                      |
| Birth weight z-score                 | 0.260               | 0.139            | -0.086       | 0.605        |                       |                  |              |              |                      |
| IMV residual (d)                     | 0.011               | 0.317            | -0.011       | 0.033        |                       |                  |              |              |                      |
| O2 residual (d)                      | -0.006              | 0.312            | -0.018       | 0.006        |                       |                  |              |              |                      |
| CPAP residual (d)                    | 0.003               | 0.883            | -0.033       | 0.038        |                       |                  |              |              |                      |
| Surfactant residual                  | -0.011              | 0.957            | -0.398       | 0.377        |                       |                  |              |              |                      |
| Antenatal Steroids                   | 0.215               | 0.630            | -0.667       | 1.097        |                       |                  |              |              |                      |
| Sepsis                               | 0.082               | 0.808            | -0.585       | 0.749        |                       |                  |              |              |                      |
| <b>Bronchiectasis</b>                |                     |                  |              |              |                       |                  |              |              | 0.035                |
| Gestational Age (w)                  | 0.003               | 0.923            | -0.058       | 0.064        |                       |                  |              |              |                      |
| Birth weight z-score                 | 0.189               | <b>0.032</b>     | 0.017        | 0.362        | 0.189                 | <b>0.032</b>     | 0.017        | 0.362        |                      |
| IMV residual (d)                     | 0.000               | 0.995            | -0.110       | 0.110        |                       |                  |              |              |                      |
| O2 residual (d)                      | -0.004              | 0.212            | -0.010       | 0.002        |                       |                  |              |              |                      |
| CPAP residual (d)                    | -0.001              | 0.953            | -0.019       | 0.017        |                       |                  |              |              |                      |



|                          |        |              |        |        |        |                  |        |        |       |
|--------------------------|--------|--------------|--------|--------|--------|------------------|--------|--------|-------|
| Surfactant residual      | 0.025  | 0.785        | -0.156 | 0.206  |        |                  |        |        |       |
| Antenatal Steroids       | 0.280  | 0.277        | -0.193 | 0.668  |        |                  |        |        |       |
| Sepsis                   | -0.119 | 0.507        | -0.473 | 0.235  |        |                  |        |        |       |
| Peribronchial thickening |        |              |        |        |        |                  |        |        |       |
| Gestational Age (w)      | -0.003 | 0.957        | -0.115 | 0.109  |        |                  |        |        |       |
| Birth weight z-score     | 0.015  | 0.926        | -0.305 | 0.335  |        |                  |        |        |       |
| IMV residual (d)         | 0.011  | 0.279        | -0.009 | 0.031  |        |                  |        |        |       |
| O2 residual (d)          | 0.003  | 0.631        | -0.008 | 0.014  |        |                  |        |        |       |
| CPAP residual (d)        | -0.019 | 0.249        | -0.052 | 0.014  |        |                  |        |        |       |
| Surfactant residual      | -0.024 | 0.890        | -0.371 | 0.322  |        |                  |        |        |       |
| Antenatal Steroids       | 0.039  | 0.923        | -0.755 | 0.832  |        |                  |        |        |       |
| Sepsis                   | 0.217  | 0.507        | -0.428 | 0.862  |        |                  |        |        |       |
| Collapse/Consolidation   |        |              |        |        |        |                  |        |        | 0.075 |
| Gestational Age (w)      | -0.020 | 0.066        | -0.041 | 0.001  |        |                  |        |        |       |
| Birth weight z-score     | -0.006 | 0.841        | -0.068 | 0.056  |        |                  |        |        |       |
| IMV residual (d)         | 0.001  | 0.458        | -0.002 | 0.005  |        |                  |        |        |       |
| O2 residual (d)          | 0.002  | <b>0.037</b> | 0.000  | 0.004  | 0.002  | 0.092            | 0.000  | 0.004  |       |
| CPAP residual (d)        | -0.003 | 0.422        | -0.009 | 0.004  |        |                  |        |        |       |
| Surfactant residual      | -0.024 | 0.479        | -0.091 | 0.043  |        |                  |        |        |       |
| Antenatal Steroids       | 0.088  | 0.249        | -0.062 | 0.238  |        |                  |        |        |       |
| Sepsis                   | 0.157  | <b>0.007</b> | 0.044  | 0.270  | 0.140  | <b>0.017</b>     | 0.025  | 0.254  |       |
| Total CT Score           |        |              |        |        |        |                  |        |        | 0.127 |
| Gestational Age (w)      | -0.640 | <b>0.001</b> | -0.998 | -0.282 | -0.642 | <b>&lt;0.001</b> | -0.994 | -0.291 |       |
| Birth weight z-score     | 0.750  | 0.177        | -0.343 | 1.843  |        |                  |        |        |       |
| IMV residual (d)         | 0.078  | <b>0.022</b> | 0.011  | 0.144  | 0.078  | <b>0.016</b>     | 0.015  | 0.142  |       |
| O2 residual (d)          | 0.015  | 0.428        | -0.022 | 0.051  |        |                  |        |        |       |
| CPAP residual (d)        | -0.067 | 0.226        | -0.177 | 0.042  |        |                  |        |        |       |
| Surfactant residual      | -0.151 | 0.800        | -1.327 | 1.026  |        |                  |        |        |       |
| Antenatal Steroids       | 0.868  | 0.508        | -1.728 | 3.454  |        |                  |        |        |       |
| Sepsis                   | 1.8751 | 0.109        | -0.398 | 3.899  |        |                  |        |        |       |

Supplementary Table 6: Neonatal factors influencing chest CT outcomes in children born preterm

|                          | Univariate Analysis |              |              |              | Multivariate Analysis |              |              |              |                      |
|--------------------------|---------------------|--------------|--------------|--------------|-----------------------|--------------|--------------|--------------|----------------------|
|                          | B                   | p-value      | 95% CI Lower | 95% CI Upper | B                     | p-value      | 95% CI Lower | 95% CI Upper | Model R <sup>2</sup> |
| <b>FEV1 z-score</b>      |                     |              |              |              |                       |              |              |              | <b>0.068</b>         |
| Subpleural opacities     | -0.140              | <b>0.007</b> | -0.241       | -0.039       | -0.140                | <b>0.007</b> | -0.241       | -0.039       |                      |
| Hypoattenuation- Insp    | -0.090              | 0.185        | -0.223       | 0.044        |                       |              |              |              |                      |
| Hypoattenuation- Exp     | 0.012               | 0.829        | -0.102       | 0.127        |                       |              |              |              |                      |
| Bronchiectasis           | 0.158               | 0.156        | -0.067       | 0.377        |                       |              |              |              |                      |
| Peribronchial thickening | -0.102              | 0.114        | -0.229       | 0.025        |                       |              |              |              |                      |
| Collapse/Consolidation   | -0.450              | 0.157        | -1.076       | 0.177        |                       |              |              |              |                      |
| Total CT score           | -0.034              | 0.075        | -0.071       | 0.004        |                       |              |              |              |                      |
| <b>FVC z-score</b>       |                     |              |              |              |                       |              |              |              |                      |
| Subpleural opacities     | -0.092              | 0.060        | -0.187       | 0.004        |                       |              |              |              |                      |
| Hypoattenuation- Insp    | 0.030               | 0.638        | -0.097       | 0.157        |                       |              |              |              |                      |
| Hypoattenuation- Exp     | 0.004               | 0.935        | -0.099       | 0.108        |                       |              |              |              |                      |
| Bronchiectasis           | 0.003               | 0.979        | -0.218       | 0.224        |                       |              |              |              |                      |
| Peribronchial thickening | -0.17               | 0.780        | -0.138       | 0.104        |                       |              |              |              |                      |
| Collapse/Consolidation   | -0.347              | 0.259        | -0.955       | 0.260        |                       |              |              |              |                      |
| Total CT score           | -0.016              | 0.381        | -0.051       | 0.020        |                       |              |              |              |                      |
| <b>FEV1/FVC z-score</b>  |                     |              |              |              |                       |              |              |              | <b>0.104</b>         |
| Subpleural opacities     | -0.099              | 0.054        | -0.199       | 0.002        |                       |              |              |              |                      |
| Hypoattenuation- Insp    | -0.165              | <b>0.013</b> | -0.295       | -0.036       | -0.138                | <b>0.038</b> | -0.268       | -0.008       |                      |
| Hypoattenuation- Exp     | -0.048              | 0.383        | -0.156       | 0.061        |                       |              |              |              |                      |
| Bronchiectasis           | 0.120               | 0.303        | -0.110       | 0.351        |                       |              |              |              |                      |
| Peribronchial thickening | -0.151              | <b>0.017</b> | -0.274       | -0.028       | -0.124                | <b>0.050</b> | -0.247       | 0.000        |                      |
| Collapse/Consolidation   | -0.444              | 0.179        | -1.094       | 0.207        |                       |              |              |              |                      |
| Total CT score           | -0.045              | <b>0.015</b> | -0.081       | -0.009       |                       |              |              |              |                      |
| <b>FEF25-75 z-score</b>  |                     |              |              |              |                       |              |              |              | <b>0.135</b>         |
| Subpleural opacities     | -0.159              | <b>0.003</b> | -0.264       | -0.054       | -0.118                | <b>0.050</b> | -0.245       | -0.000       |                      |
| Hypoattenuation- Insp    | -0.164              | <b>0.022</b> | -0.304       | -0.024       | -0.061                | 0.442        | -0.217       | 0.095        |                      |
| Hypoattenuation- Exp     | -0.046              | 0.432        | -0.163       | 0.070        |                       |              |              |              |                      |
| Bronchiectasis           | 0.085               | 0.499        | -0.164       | 0.335        |                       |              |              |              |                      |
| Peribronchial thickening | -0.167              | <b>0.014</b> | -0.299       | -0.350       | -0.130                | <b>0.050</b> | -0.261       | 0.002        |                      |
| Collapse/Consolidation   | -0.636              | 0.072        | -1.331       | 0.058        |                       |              |              |              |                      |
| Total CT score           | --0.026             | <b>0.004</b> | -0.095       | -0.018       |                       |              |              |              |                      |

Supplementary Table 7: The impact of chest CT abnormalities on forced expiratory flows and volumes (spirometry outcomes).

|                          | Univariate Analysis |              |              |              | Multivariate Analysis |              |              |              |                      |
|--------------------------|---------------------|--------------|--------------|--------------|-----------------------|--------------|--------------|--------------|----------------------|
|                          | B                   | p-value      | 95% CI Lower | 95% CI Upper | B                     | p-value      | 95% CI Lower | 95% CI Upper | Model R <sup>2</sup> |
| <b>LCI</b>               |                     |              |              |              |                       |              |              |              |                      |
| Subpleural opacities     | -0.052              | 0.139        | -0.121       | 0.017        |                       |              |              |              |                      |
| Hypoattenuation- Insp    | 0.031               | 0.531        | -0.067       | 0.130        |                       |              |              |              |                      |
| Hypoattenuation- Exp     | 0.004               | 0.923        | -0.074       | 0.081        |                       |              |              |              |                      |
| Bronchiectasis           | -0.127              | 0.085        | -0.271       | 0.018        |                       |              |              |              |                      |
| Peribronchial thickening | -0.078              | 0.069        | -0.161       | 0.006        |                       |              |              |              |                      |
| Collapse/Consolidation   | -0.159              | 0.490        | -0.615       | 0.296        |                       |              |              |              |                      |
| Total CT score           | -0.016              | 0.226        | -0.041       | 0.010        |                       |              |              |              |                      |
| <b>FRC z-score</b>       |                     |              |              |              |                       |              |              |              |                      |
| Subpleural opacities     | 0.313               | 0.375        | -0.383       | 1.009        |                       |              |              |              |                      |
| Hypoattenuation- Insp    | -0.451              | 0.363        | -1.429       | 0.527        |                       |              |              |              |                      |
| Hypoattenuation- Exp     | -0.473              | 0.224        | -1.239       | 0.293        |                       |              |              |              |                      |
| Bronchiectasis           | 1.086               | 0.139        | -0.357       | 2.529        |                       |              |              |              |                      |
| Peribronchial thickening | 0.410               | 0.337        | -0.433       | 1.253        |                       |              |              |              |                      |
| Collapse/Consolidation   | -1.586              | 0.490        | -6.127       | 2.955        |                       |              |              |              |                      |
| Total CT score           | 0.020               | 0.877        | -0.235       | 0.275        |                       |              |              |              |                      |
| <b>TLC z-score</b>       |                     |              |              |              |                       |              |              |              | 0.043                |
| Subpleural opacities     | 0.020               | 0.659        | -0.506       | 0.162        |                       |              |              |              |                      |
| Hypoattenuation- Insp    | 0.044               | 0.491        | -0.082       | 0.169        |                       |              |              |              |                      |
| Hypoattenuation- Exp     | -0.020              | 0.693        | -0.118       | 0.079        |                       |              |              |              |                      |
| Bronchiectasis           | 0.202               | <b>0.030</b> | 0.020        | 0.384        | 0.202                 | <b>0.030</b> | 0.020        | 0.384        |                      |
| Peribronchial thickening | 0.081               | 0.140        | -0.027       | 0.188        |                       |              |              |              |                      |
| Collapse/Consolidation   | -0.270              | 0.348        | -0.838       | 0.298        |                       |              |              |              |                      |
| Total CT score           | 0.015               | 0.356        | -0.017       | 0.048        |                       |              |              |              |                      |
| <b>RV z-score</b>        |                     |              |              |              |                       |              |              |              | 0.085                |
| Subpleural opacities     | 0.067               | 0.244        | -0.047       | 0.182        |                       |              |              |              |                      |
| Hypoattenuation- Insp    | -0.027              | 0.748        | -0.194       | 0.139        |                       |              |              |              |                      |
| Hypoattenuation- Exp     | -0.093              | 0.141        | -0.218       | 0.031        |                       |              |              |              |                      |
| Bronchiectasis           | 0.166               | 0.164        | -0.069       | 0.402        |                       |              |              |              |                      |
| Peribronchial thickening | 0.060               | 0.388        | -0.078       | 0.198        |                       |              |              |              |                      |
| Collapse/Consolidation   | -1.156              | <b>0.002</b> | -1.892       | -0.420       | -1.156                | <b>0.002</b> | -1.892       | -0.420       |                      |
| Total CT score           | 0.002               | 0.928        | -0.040       | 0.044        |                       |              |              |              |                      |
| <b>FRC/TLC</b>           |                     |              |              |              |                       |              |              |              |                      |
| Subpleural opacities     | 0.313               | 0.375        | -0.383       | 1.009        |                       |              |              |              |                      |
| Hypoattenuation- Insp    | -0.451              | 0.363        | -1.429       | 0.527        |                       |              |              |              |                      |
| Hypoattenuation- Exp     | -0.473              | 0.224        | -1.239       | 0.293        |                       |              |              |              |                      |
| Bronchiectasis           | 1.086               | 0.139        | -0.357       | 2.529        |                       |              |              |              |                      |

|                          |        |              |         |        |        |              |         |        |       |
|--------------------------|--------|--------------|---------|--------|--------|--------------|---------|--------|-------|
| Peribronchial thickening | 0.410  | 0.337        | -0.433  | 1.253  |        |              |         |        |       |
| Collapse/Consolidation   | -1.586 | 0.490        | -6.127  | 2.955  |        |              |         |        |       |
| Total CT score           | 0.020  | 0.877        | -0.235  | 0.275  |        |              |         |        |       |
| RV/TLC                   |        |              |         |        |        |              |         |        | 0.088 |
| Subpleural opacities     | 0.422  | 0.202        | -0.231  | 1.075  |        |              |         |        |       |
| Hypoattenuation- Insp    | -0.283 | 0.558        | -1.235  | 0.670  |        |              |         |        |       |
| Hypoattenuation- Exp     | -0.614 | 0.090        | -1.326  | 0.098  |        |              |         |        |       |
| Bronchiectasis           | 0.675  | 0.325        | -0.680  | 2.030  |        |              |         |        |       |
| Peribronchial thickening | 0.153  | 0.703        | -0.639  | 0.945  |        |              |         |        |       |
| Collapse/Consolidation   | -6.779 | <b>0.002</b> | -10.991 | -2.566 | -6.779 | <b>0.002</b> | -10.991 | -2.566 |       |
| Total CT score           | -0.024 | 0.847        | -0.265  | 0.218  |        |              |         |        |       |

Supplementary Table 8: The impact of chest CT abnormalities on measures of lung volume and ventilation inhomogeneity.

|                          | Univariate Analysis |                  |                 |                 | Multivariate Analysis |              |                 |                 |                      |
|--------------------------|---------------------|------------------|-----------------|-----------------|-----------------------|--------------|-----------------|-----------------|----------------------|
|                          | B                   | p-value          | 95% CI<br>Lower | 95% CI<br>Upper | B                     | p-value      | 95% CI<br>Lower | 95% CI<br>Upper | Model R <sup>2</sup> |
| <b>DLCO z-score</b>      |                     |                  |                 |                 |                       |              |                 |                 |                      |
| Subpleural opacities     | -0.069              | 0.359            | -0.218          | 0.080           |                       |              |                 |                 |                      |
| Hypoattenuation- Insp    | -0.139              | 0.181            | -0.344          | 0.066           |                       |              |                 |                 |                      |
| Hypoattenuation- Exp     | -0.020              | 0.804            | -0.177          | 0.137           |                       |              |                 |                 |                      |
| Bronchiectasis           | 0.167               | 0.247            | -0.119          | 0.452           |                       |              |                 |                 |                      |
| Peribronchial thickening | 0.082               | 0.353            | -0.093          | 0.256           |                       |              |                 |                 |                      |
| Collapse/Consolidation   | 0.382               | 0.424            | -0.568          | 1.333           |                       |              |                 |                 |                      |
| Total CT score           | -0.013              | 0.621            | -0.066          | 0.040           |                       |              |                 |                 |                      |
| <b>VA z-score</b>        |                     |                  |                 |                 |                       |              |                 |                 |                      |
| Subpleural opacities     | 0.079               | 0.299            | -0.072          | 0.231           |                       |              |                 |                 |                      |
| Hypoattenuation- Insp    | 0.106               | 0.316            | -0.104          | 0.316           |                       |              |                 |                 |                      |
| Hypoattenuation- Exp     | 0.037               | 0.642            | -0.122          | 0.197           |                       |              |                 |                 |                      |
| Bronchiectasis           | 0.088               | 0.552            | -0.205          | 0.380           |                       |              |                 |                 |                      |
| Peribronchial thickening | -0.003              | 0.971            | -0.182          | 0.176           |                       |              |                 |                 |                      |
| Collapse/Consolidation   | 0.838               | 0.082            | -0.109          | 1.785           |                       |              |                 |                 |                      |
| Total CT score           | 0.022               | 0.405            | -0.031          | 0.076           |                       |              |                 |                 |                      |
| <b>KCO z-score</b>       |                     |                  |                 |                 |                       |              |                 |                 | 0.223                |
| Subpleural opacities     | -0.167              | <b>0.005</b>     | -0.281          | -0.052          | -0.090                | 0.144        | -0.212          | 0.032           |                      |
| Hypoattenuation- Insp    | -0.288              | <b>&lt;0.001</b> | -0.440          | -0.135          | -0.233                | <b>0.009</b> | -0.406          | -0.061          |                      |
| Hypoattenuation- Exp     | -0.074              | 0.249            | -0.201          | 0.053           |                       |              |                 |                 |                      |
| Bronchiectasis           | 0.098               | 0.405            | -0.136          | 0.333           |                       |              |                 |                 |                      |
| Peribronchial thickening | 0.094               | 0.190            | -0.048          | 0.235           |                       |              |                 |                 |                      |
| Collapse/Consolidation   | -0.407              | 0.297            | -1.179          | 0.366           |                       |              |                 |                 |                      |
| Total CT score           | -0.042              | <b>0.047</b>     | -0.084          | -0.001          |                       |              |                 |                 |                      |

Supplementary Table 9: The impact of chest CT abnormalities on measures of gas exchange.

|                          | Univariate Analysis |         |              |              | Multivariate Analysis |         |              |              |                      |
|--------------------------|---------------------|---------|--------------|--------------|-----------------------|---------|--------------|--------------|----------------------|
|                          | B                   | p-value | 95% CI Lower | 95% CI Upper | B                     | p-value | 95% CI Lower | 95% CI Upper | Model R <sup>2</sup> |
| <b>Rrs8 z-score</b>      |                     |         |              |              |                       |         |              |              |                      |
| Subpleural opacities     | -0.020              | 0.716   | -0.128       | 0.088        |                       |         |              |              |                      |
| Hypoattenuation- Insp    | -0.062              | 0.488   | -0.237       | 0.114        |                       |         |              |              |                      |
| Hypoattenuation- Exp     | 0.005               | 0.929   | -0.116       | 0.127        |                       |         |              |              |                      |
| Bronchiectasis           | -0.045              | 0.657   | -0.244       | 0.154        |                       |         |              |              |                      |
| Peribronchial thickening | 0.083               | 0.182   | -0.040       | 0.206        |                       |         |              |              |                      |
| Collapse/Consolidation   | 0.052               | 0.892   | -0.711       | 0.816        |                       |         |              |              |                      |
| Total CT score           | 0.006               | 0.766   | -0.037       | 0.050        |                       |         |              |              |                      |
| <b>Xrs8 z-score</b>      |                     |         |              |              |                       |         |              |              |                      |
| Subpleural opacities     | -0.038              | 0.468   | -0.142       | 0.066        |                       |         |              |              |                      |
| Hypoattenuation- Insp    | -0.042              | 0.620   | -0.211       | 0.127        |                       |         |              |              |                      |
| Hypoattenuation- Exp     | -0.025              | 0.675   | -0.142       | 0.092        |                       |         |              |              |                      |
| Bronchiectasis           | 0.126               | 0.189   | -0.063       | 0.316        |                       |         |              |              |                      |
| Peribronchial thickening | -0.073              | 0.225   | -0.191       | 0.045        |                       |         |              |              |                      |
| Collapse/Consolidation   | -0.243              | 0.511   | -0.974       | 0.488        |                       |         |              |              |                      |
| Total CT score           | -0.019              | 0.365   | -0.060       | 0.022        |                       |         |              |              |                      |
| <b>AX z-score</b>        |                     |         |              |              |                       |         |              |              |                      |
| Subpleural opacities     | 0.063               | 0.286   | -0.053       | 0.179        |                       |         |              |              |                      |
| Hypoattenuation- Insp    | 0.048               | 0.612   | -0.140       | 0.236        |                       |         |              |              |                      |
| Hypoattenuation- Exp     | 0.074               | 0.262   | -0.056       | 0.203        |                       |         |              |              |                      |
| Bronchiectasis           | -0.160              | 0.135   | -0.370       | 0.050        |                       |         |              |              |                      |
| Peribronchial thickening | -0.005              | 0.937   | -0.141       | 0.131        |                       |         |              |              |                      |
| Collapse/Consolidation   | 0.421               | 0.315   | -0.397       | 1.221        |                       |         |              |              |                      |
| Total CT score           | 0.022               | 0.353   | -0.024       | 0.067        |                       |         |              |              |                      |
| <b>Fres z-score</b>      |                     |         |              |              |                       |         |              |              |                      |
| Subpleural opacities     | 0.107               | 0.110   | -0.024       | 0.238        |                       |         |              |              |                      |
| Hypoattenuation- Insp    | -0.015              | 0.890   | -0.229       | 0.199        |                       |         |              |              |                      |
| Hypoattenuation- Exp     | 0.088               | 0.237   | -0.059       | 0.236        |                       |         |              |              |                      |
| Bronchiectasis           | -0.142              | 0.244   | -0.382       | 0.098        |                       |         |              |              |                      |
| Peribronchial thickening | 0.028               | 0.719   | -0.127       | 0.183        |                       |         |              |              |                      |
| Collapse/Consolidation   | 0.405               | 0.387   | -0.520       | 1.330        |                       |         |              |              |                      |
| Total CT score           | 0.033               | 0.214   | -0.019       | 0.085        |                       |         |              |              |                      |

Supplementary Table 10: The impact of chest CT abnormalities on measures of respiratory system mechanics (Forced Oscillation Technique)
